# Supplementary material for: Anatomical and functional connectivity support the existence of a salience network node within the caudal ventrolateral prefrontal cortex
Source: eLife journal article supplement (doi:10.7554/elife.76334), 2022-05-05

**(A) projections from the frontal and insular cortices to the rostral area 47/12**

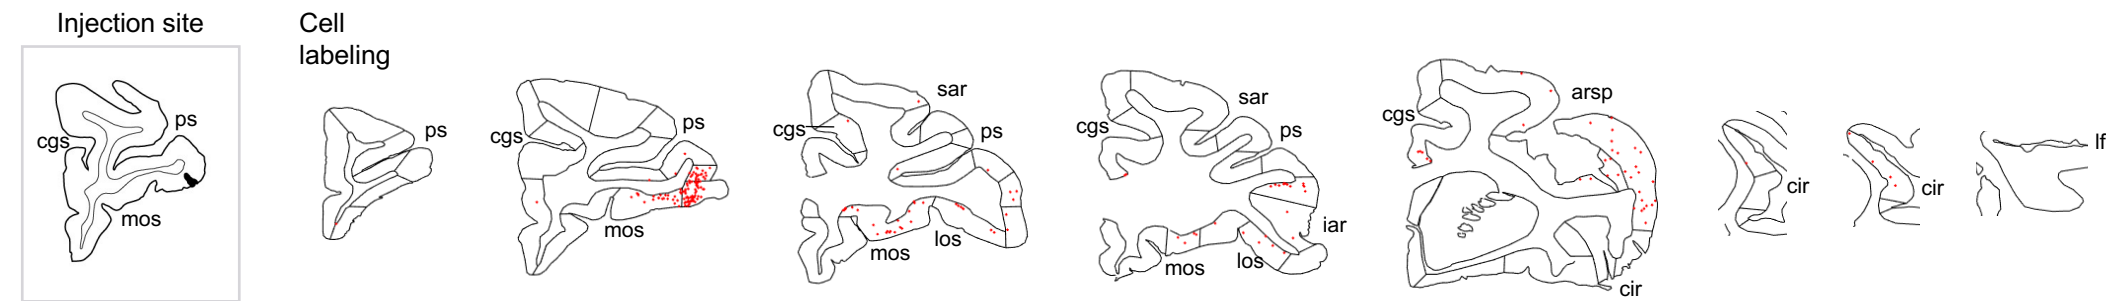

**(B) projections from the frontal and insular cortices to the mid area 47/12I**

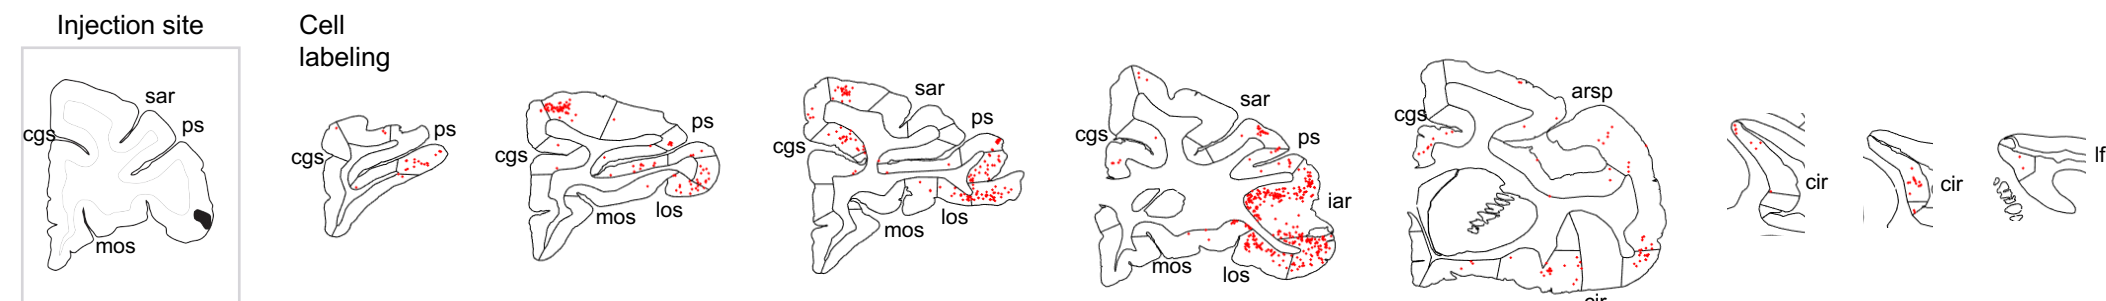

**(C) projections from the frontal and insular cortices to the mid area 47/12o**

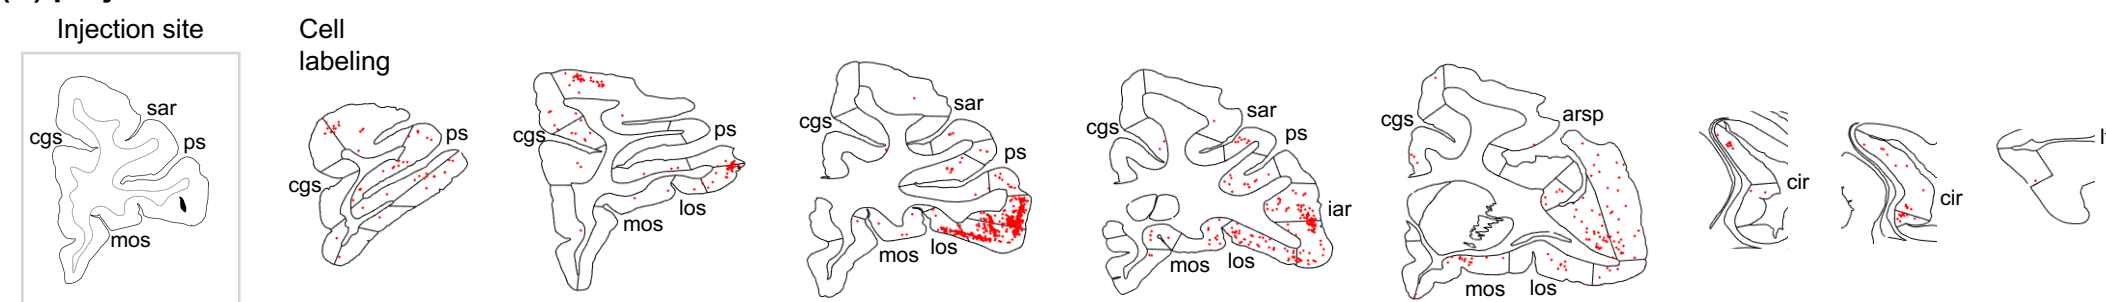

**(D) projections from the frontal and insular cortices to the caudal area 47/12**

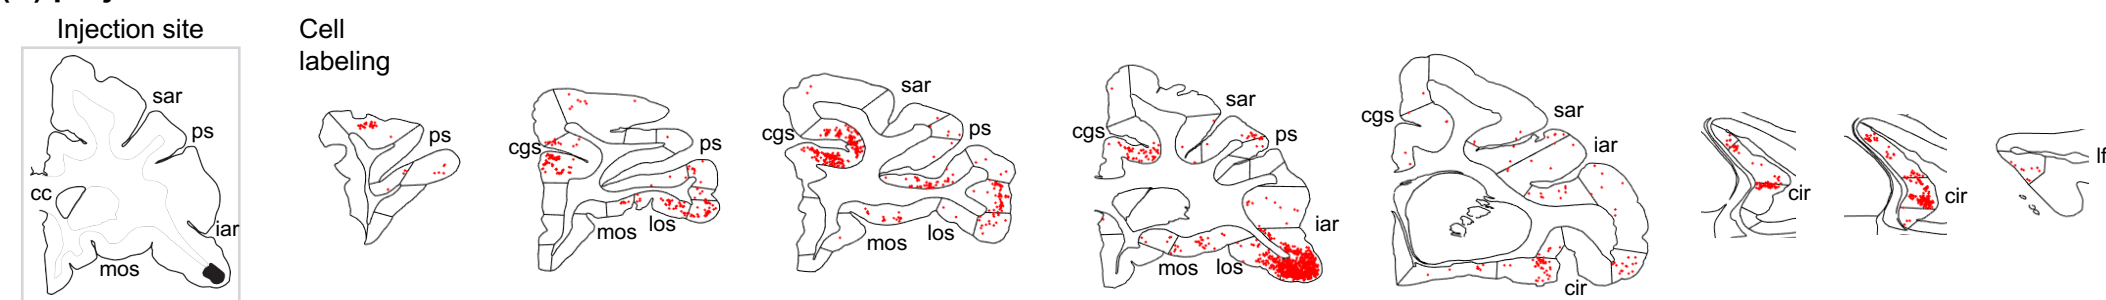

**(E) projections from the frontal and insular cortices to the rostral area 45**

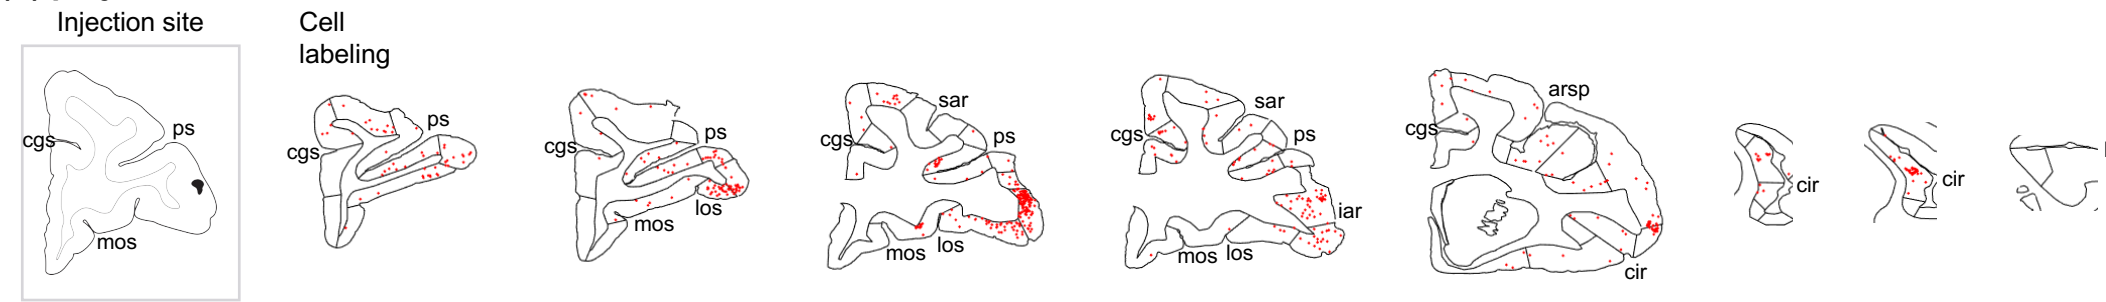

**(F) projections from the frontal and insular cortices to the caudal area 45**

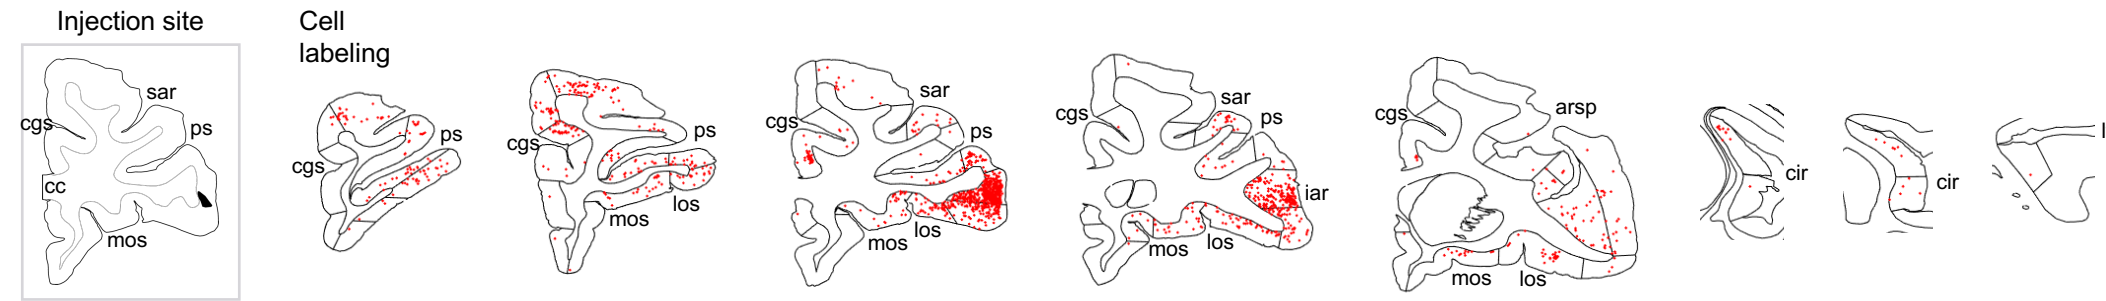

**(G) projections from the frontal and insular cortices to the area 44**

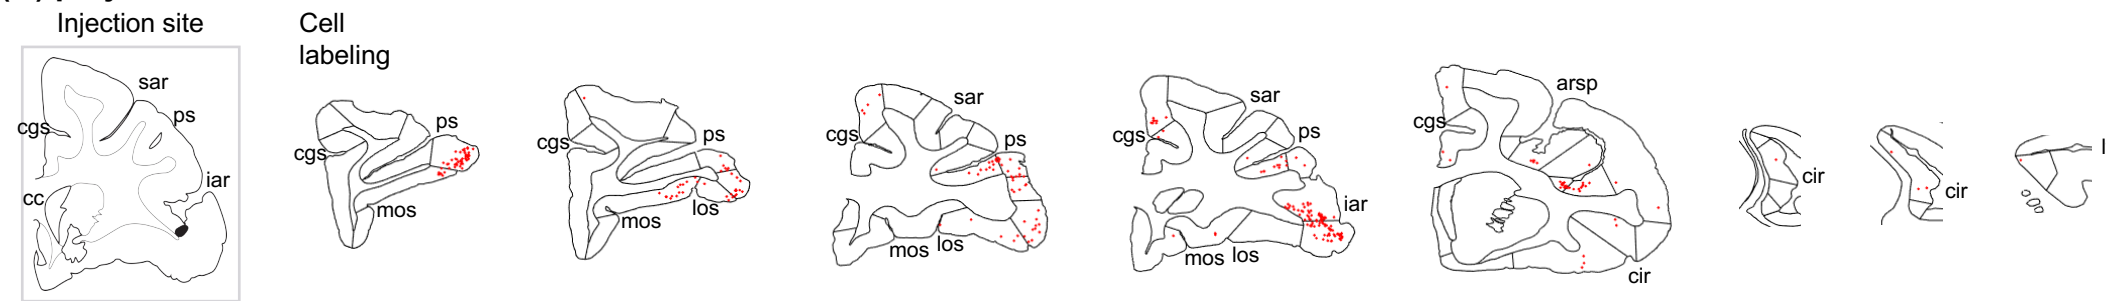

Supplement: supp [file elife-76334-supp-v1.zip]
