# Supplementary material for: Anatomical and functional connectivity support the existence of a salience network node within the caudal ventrolateral prefrontal cortex
Source: eLife journal article supplement (doi:10.7554/elife.76334), 2022-05-05

**vIPFC 1 - Rost. 47/12**

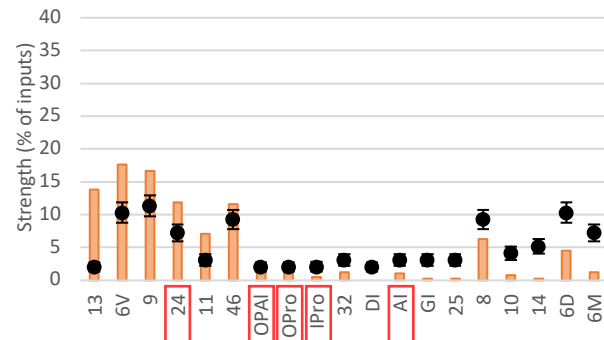

**vIPFC 2 - Mid. 47/121**

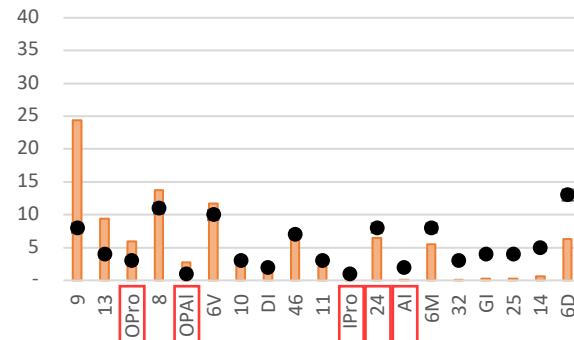

**vIPFC 3 - Mid. 47/120**

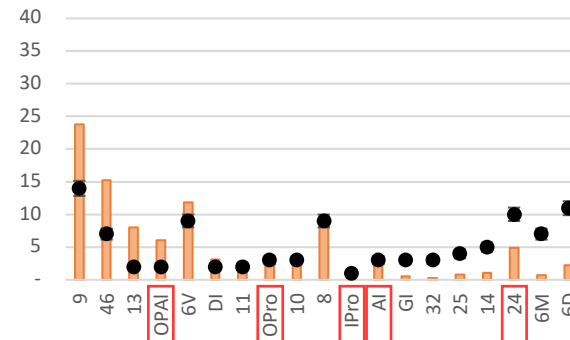

**vIPFC 4a - Caud. 47/12**

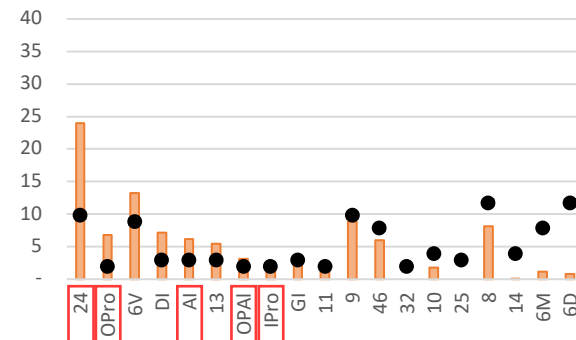

**vIPFC 5 - Rost. 45**

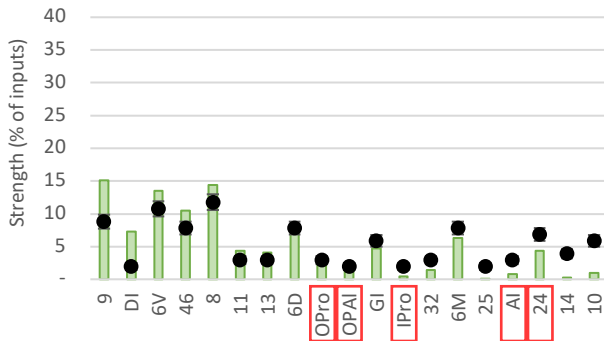

**vIPFC 6 - Caud. 45**

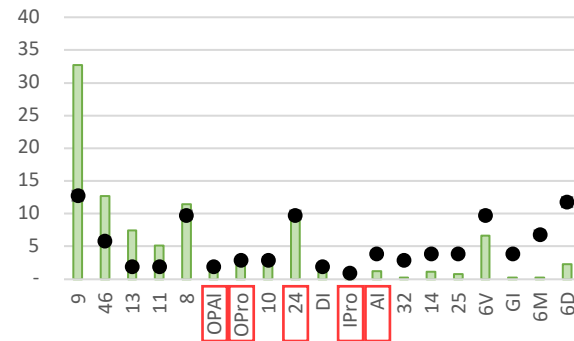

**vIPFC 7 - Area 44**

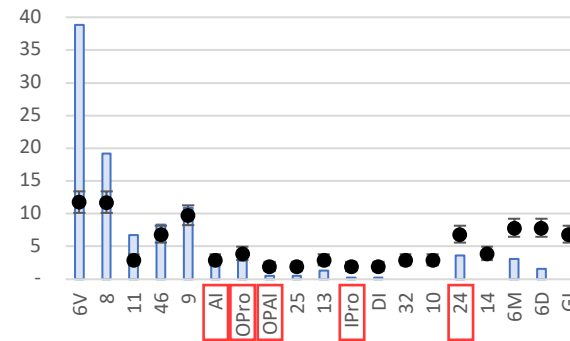

**Number of cells per case**

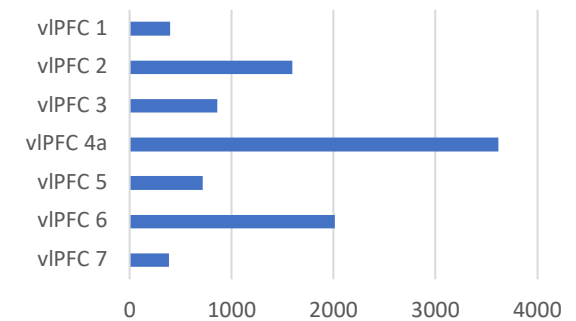

Supplement: supp [file elife-76334-supp-v1.zip]
