# Supplementary material for: Anatomical and functional connectivity support the existence of a salience network node within the caudal ventrolateral prefrontal cortex
Source: eLife journal article supplement (doi:10.7554/elife.76334), 2022-05-05

## (A) dACC and AI masks in the macaque MNI template

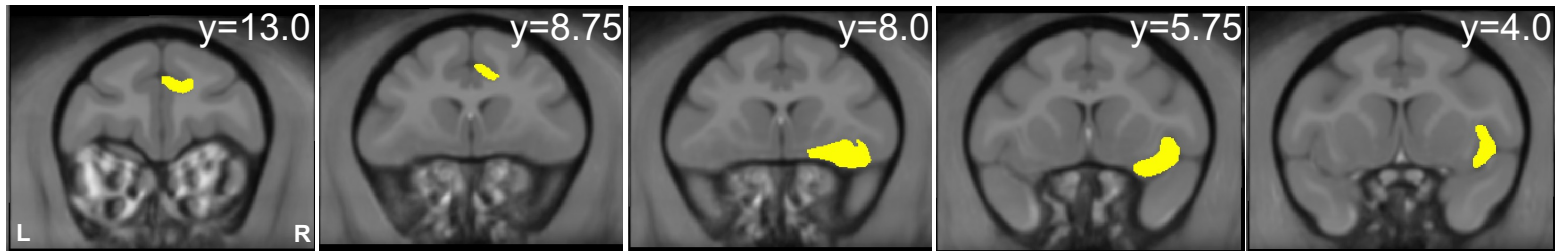

## (B) Caudal 47/12 seeds for each individual monkey in the macaque MNI template

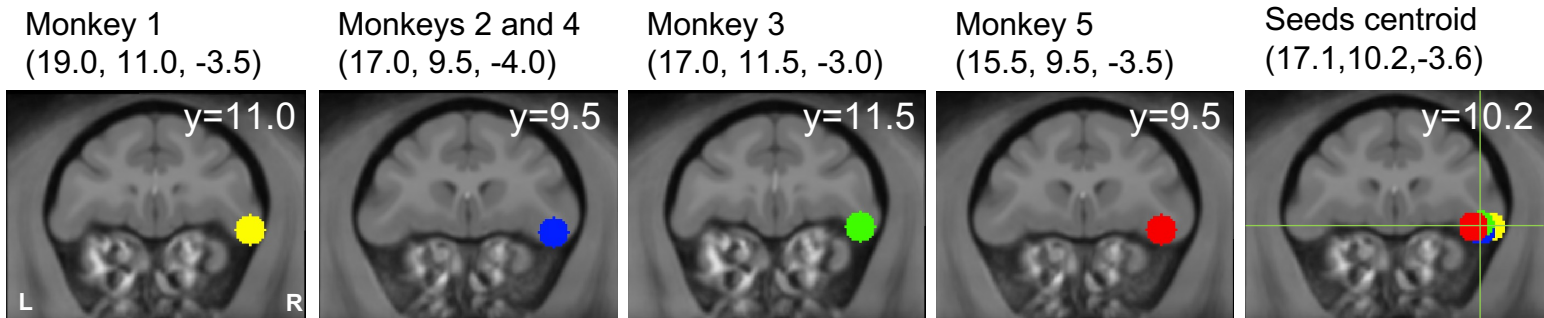

Supplement: supp [file elife-76334-supp-v1.zip]
