# Supplementary material for: Anatomical and functional connectivity support the existence of a salience network node within the caudal ventrolateral prefrontal cortex
Source: eLife journal article supplement (doi:10.7554/elife.76334), 2022-05-05

**Caudal 47/12**

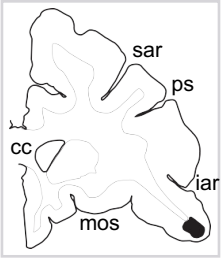

**Dorsomedial Thalamus (DT)**

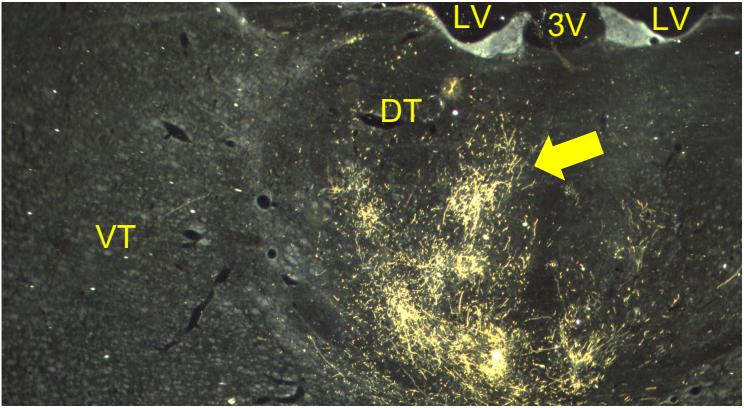

**Sublenticular Extended Amygdala**

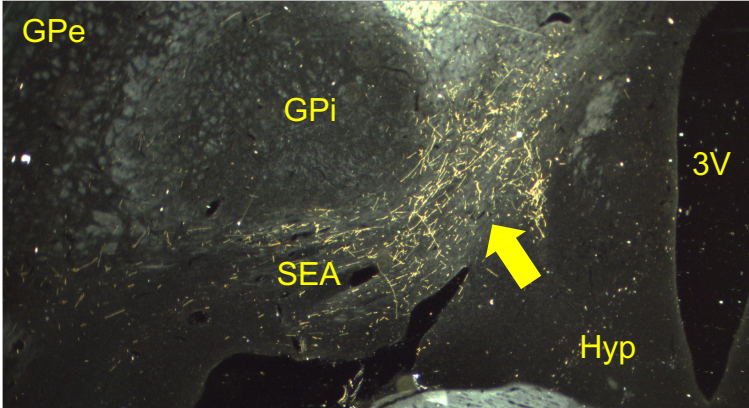

**Periaqueductal Gray (PAG)**

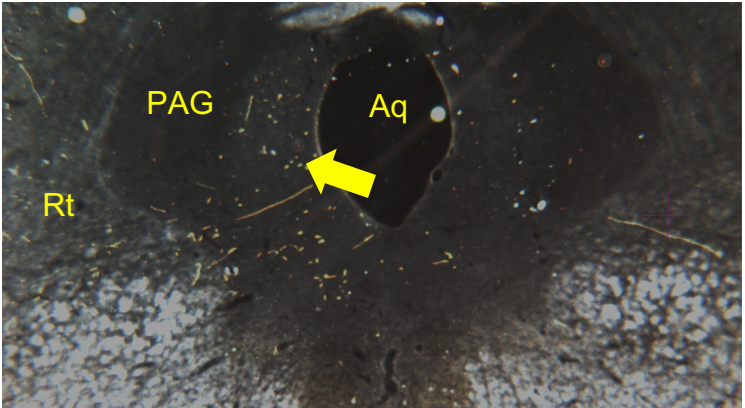

**Caudal 47/12  
(replication)**

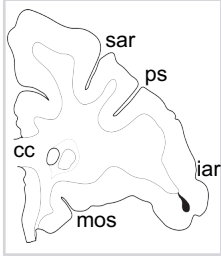

**Dorsomedial Thalamus (DT)**

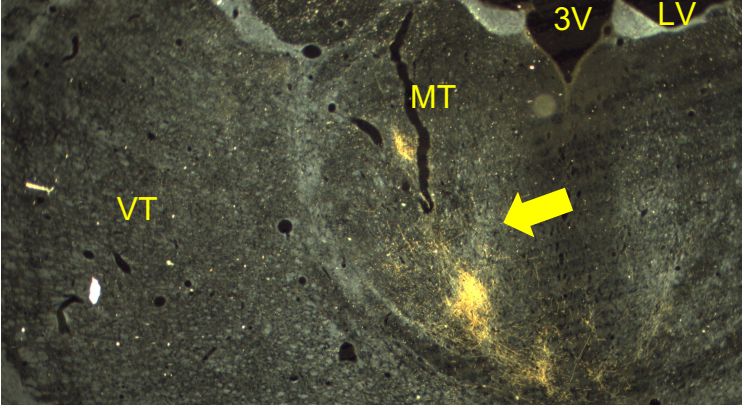

**Sublenticular Extended Amygdala**

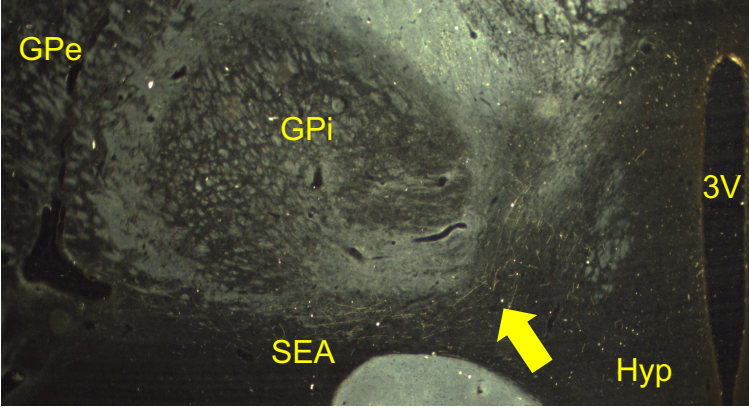

**Periaqueductal Gray (PAG)**

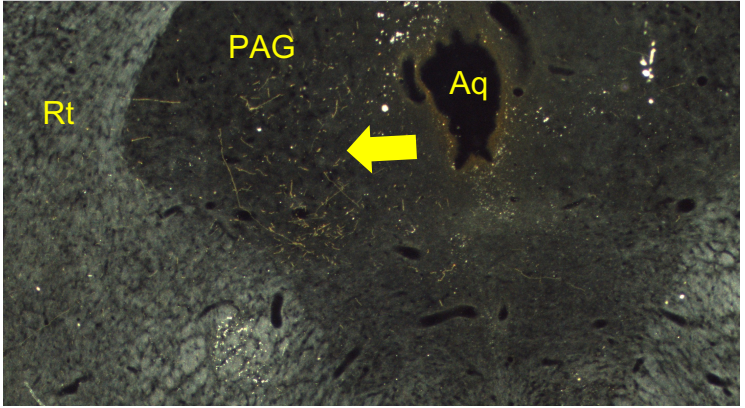

Supplement: supp [file elife-76334-supp-v1.zip]
