# Supplementary material for: Anatomical and functional connectivity support the existence of a salience network node within the caudal ventrolateral prefrontal cortex
Source: eLife journal article supplement (doi:10.7554/elife.76334), 2022-05-05

### (A) dACC and AI masks in the human MNI template

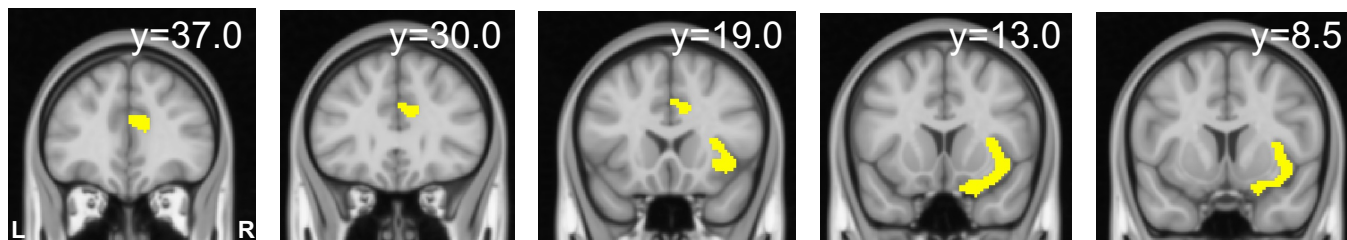

### (B) fcMRI replication using 3mm seeds (N=1000)

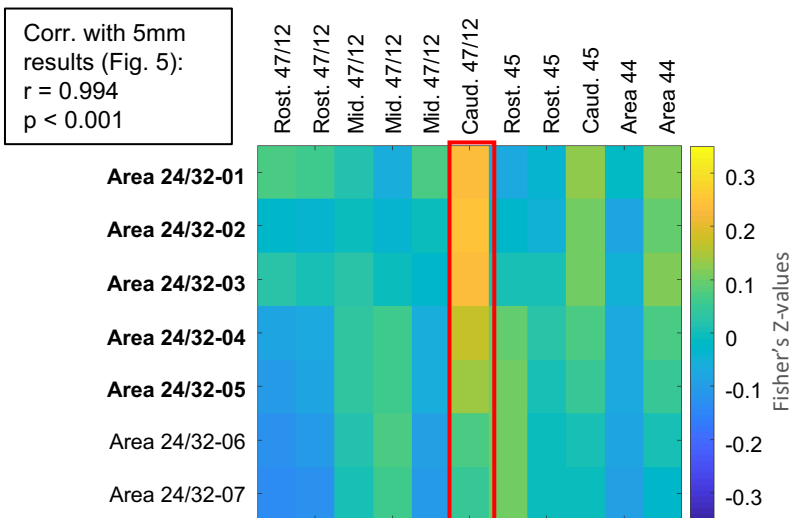

### (C) fcMRI replication using 7mm seeds (N=1000)

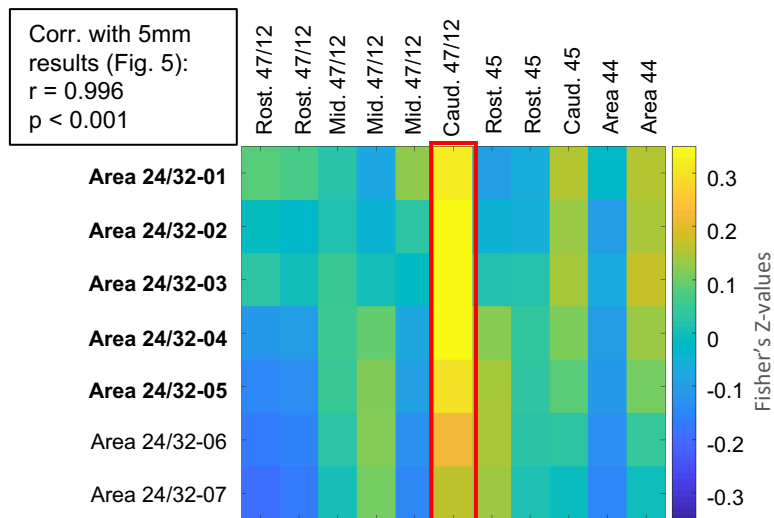

### (D) fcMRI test-retest analysis using 5mm seeds in two independent subsamples (N=500)

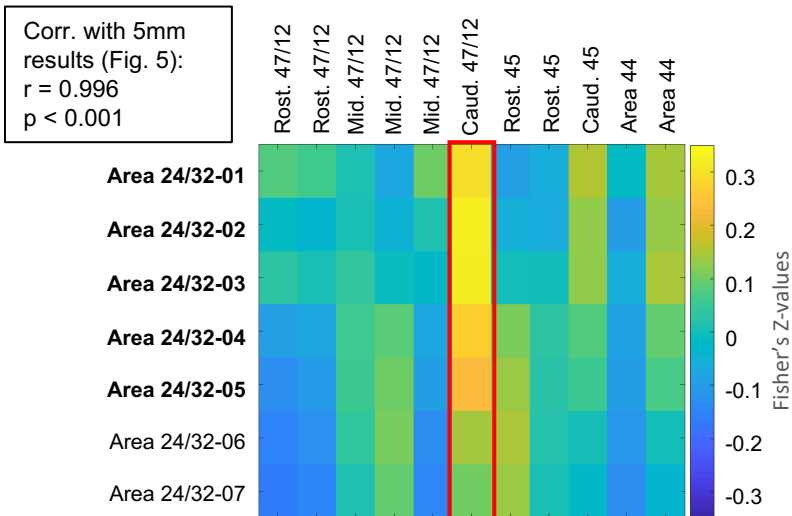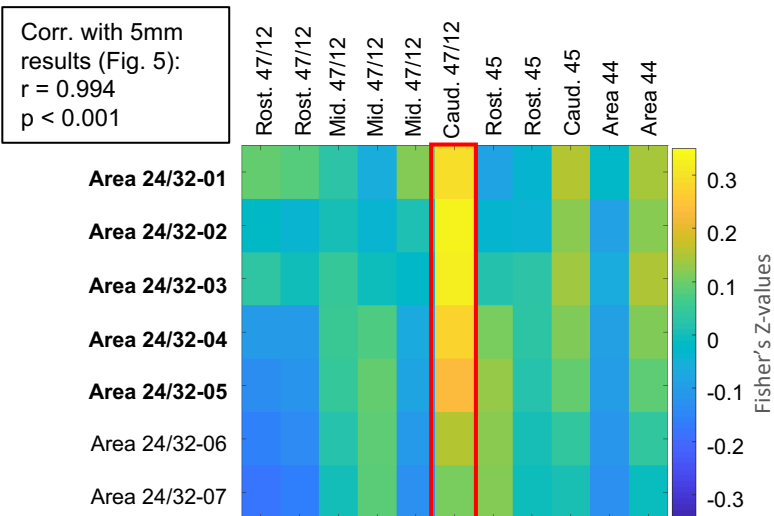

Supplement: supp [file elife-76334-supp-v1.zip]
