# Supplementary material for: Anatomical and functional connectivity support the existence of a salience network node within the caudal ventrolateral prefrontal cortex
Source: eLife journal article supplement (doi:10.7554/elife.76334), 2022-05-05
Supplement: supp [file elife-76334-supp-v1.zip]

Archive with 7 entries (7 files):
- elife_poa_e76334_Transparent_Reporting_File.pdf
- elife_poa_e76334_Figure_2_figure_supplement_1.pdf
- elife_poa_e76334_Figure_2_figure_supplement_2.pdf
- elife_poa_e76334_Figure_3_figure_supplement_1.pdf
- elife_poa_e76334_Figure_4_figure_supplement_1.pdf
- elife_poa_e76334_Figure_5_figure_supplement_1.pdf
- elife_poa_e76334_Supplementary_file_1.pptx
